# Supplementary material for: The Production of Isoflavones by <em>Genista tinctoria</em> L. In Vitro Culture after Two Vanadium Compounds Application. Possible Transport Mechanism of Secondary Metabolites through Plasma Membrane
Source: Preprints.org preprint supplement (doi:10.20944/preprints201806.0029.v1), 2018-06-04
Supplement: Supplementary file 1 [file supplementary]

**Table S1.** The content of isoflavones in nutrient medium (mg/100 mL) and dry matter (mg/g) of *Genista tinctoria* after application of distilled water for 24 or 48 h.

|                 | Cultivation time [h] | Genistin          | Genistein       | Biochanin A     | Daidzein        | Formononetin    |
|-----------------|----------------------|-------------------|-----------------|-----------------|-----------------|-----------------|
| Nutrient medium | 24                   | 2.9036 ± 0.4115   | 1.0253 ± 0.1508 | 0.4229 ± 0.1441 | 0.5570 ± 0.0407 | 2.3079 ± 0.1224 |
|                 | 48                   | 2.4361 ± 0.7303   | 0.8545 ± 0.1806 | 0.8688 ± 0.1171 | 0.8816 ± 0.1302 | 2.1890 ± 0.2681 |
| Dry matter      | 24                   | 46.4030 ± 10.6300 | 2.2117 ± 0.5144 | -               | 0.3663 ± 0.0633 | 0.5323 ± 0.2065 |
|                 | 48                   | 45.6143 ± 4.62356 | 2.6477 ± 0.2492 | -               | 0.4057 ± 0.0442 | 0.3770 ± 0.0745 |

Data are mean ± SE of three repeats.
