# Supplementary material for: The Production of Isoflavones by <em>Genista tinctoria</em> L. In Vitro Culture after Two Vanadium Compounds Application. Possible Transport Mechanism of Secondary Metabolites through Plasma Membrane
Source: Preprints.org preprint supplement (doi:10.20944/preprints201806.0029.v1), 2018-06-04
Supplement: Supplementary file 2 [file supplementary]

**Table 2.** The content of isoflavones in nutrient medium (mg/100 mL) and dry matter (mg/g) of *Genista tinctoria* after application of  $\text{NH}_4\text{VO}_3$  (10  $\mu\text{M}$ ) alone for 24 hours. The values were used for a comparison with specific inhibitor in one passage of cell culture.

|                 | Inhibitor                | Genistin             | Genistein           | Biochanin A         | Daidzein            | Formononetin        |
|-----------------|--------------------------|----------------------|---------------------|---------------------|---------------------|---------------------|
| Nutrient medium | $\text{NH}_4\text{Cl}$   |                      |                     |                     |                     |                     |
|                 | $\text{Na}_3\text{VO}_4$ | $3.9106 \pm 0.5044$  | $2.2895 \pm 0.6905$ | $0.6720 \pm 0.2498$ | $0.8022 \pm 0.0352$ | $3.6870 \pm 0.2248$ |
|                 | Verapamil                |                      |                     |                     |                     |                     |
|                 | Glibenclamide            |                      |                     |                     |                     |                     |
|                 | Gramicidin               | $3.4416 \pm 0.7951$  | $1.3079 \pm 0.1854$ | $0.3431 \pm 0.0238$ | $1.9948 \pm 0.1251$ | $3.4535 \pm 0.4204$ |
|                 | Brefeldin A              |                      |                     |                     |                     |                     |
|                 | Probenecid               |                      |                     |                     |                     |                     |
| Dry matter      | $\text{NH}_4\text{Cl}$   |                      |                     |                     |                     |                     |
|                 | $\text{Na}_3\text{VO}_4$ | $76.5500 \pm 7.7996$ | $1.2230 \pm 0.1548$ | -                   | $0.3877 \pm 0.0212$ | $0.2997 \pm 0.0153$ |
|                 | Verapamil                |                      |                     |                     |                     |                     |
|                 | Glibenclamide            |                      |                     |                     |                     |                     |
|                 | Gramicidin               | $69.7713 \pm 5.8396$ | $0.6677 \pm 0.1420$ | -                   | $0.3310 \pm 0.0098$ | $0.3820 \pm 0.0286$ |
|                 | Brefeldin A              |                      |                     |                     |                     |                     |
|                 | Probenecid               |                      |                     |                     |                     |                     |

Data are mean  $\pm$  SE of three repeats.
